# Supplementary material
Source: PubMed Central journal article supplement (PMC5536956)
Supplement: NIHMS877615-supplement-supplement_1.pdf [file NIHMS877615-supplement-supplement_1.pdf]

### Supplement S1: Nomogram Equation and Survival of Baseline Population

Equation:  $S = S_0 \wedge \exp(-3.2868467 + 0.039854143 * \text{AGE} + 0.092083744 * \log(\text{PSA}) - 0.20891173 * \log(\text{PSADT}) + 0.21978332 * (\text{bone\_mets} == "3-9") + 0.32207461 * (\text{bone\_mets} == ">=10") + 1.0446017 * (\text{bone\_mets} == \text{"Visceral/Lymph node"})$ )

Survival of baseline population ( $S_0$ ) for years 1, 2, 3, 4 and 5 are, respectively, 0.5631, 0.2580, 0.1725, 0.1168, and 0.0739.

**Supplemental Table 1: Variation Inflation Factors for the Final Model**

| <b>Variables</b>                                    | <b>VIF</b>  |
|-----------------------------------------------------|-------------|
| <b>Age at Metastases (years)</b>                    | 1.07        |
| <b>Number of Bone Metastases</b>                    |             |
| 1-2                                                 | <i>ref.</i> |
| 3-9                                                 | 1.29        |
| ≥10                                                 | 1.51        |
| Visceral/Lymph Node Only                            | 1.66        |
| <b>PSA at Metastases<sup>a</sup> (ng/mL)</b>        | 1.38        |
| <b>PSADT at Metastases<sup>a</sup> (ng/mL/year)</b> | 1.23        |

Abbreviation: VIF = variation inflation factor.

<sup>a</sup>Log transformed.

**Supplemental Table 2: Multivariable Analysis for the Final Model**

| <b>Variables</b>                                    | <b>HR</b>   | <b>95% CI</b> | <b>P*</b> |
|-----------------------------------------------------|-------------|---------------|-----------|
| <b>Age at Metastases (years)</b>                    | 1.04        | 1.02-1.06     | <0.001    |
| <b>Number of Bone Metastases</b>                    |             |               |           |
| 1-2                                                 | <i>ref.</i> |               |           |
| 3-9                                                 | 1.25        | 0.71-2.17     | 0.439     |
| ≥10                                                 | 1.38        | 0.93-2.05     | 0.111     |
| Visceral/Lymph Node Only                            | 2.84        | 1.82-4.45     | <0.001    |
| <b>PSA at Metastases<sup>a</sup> (ng/mL)</b>        | 1.10        | 0.98-1.23     | 0.117     |
| <b>PSADT at Metastases<sup>a</sup> (ng/mL/year)</b> | 0.87        | 0.68-0.96     | 0.016     |

Abbreviation: CI = confidence interval; HR = hazard ratio.

<sup>a</sup>Log transformed.

**Supplemental Figure 1: Distribution of Predicted Overall Survival at 2 Years After mCRPC Diagnosis**

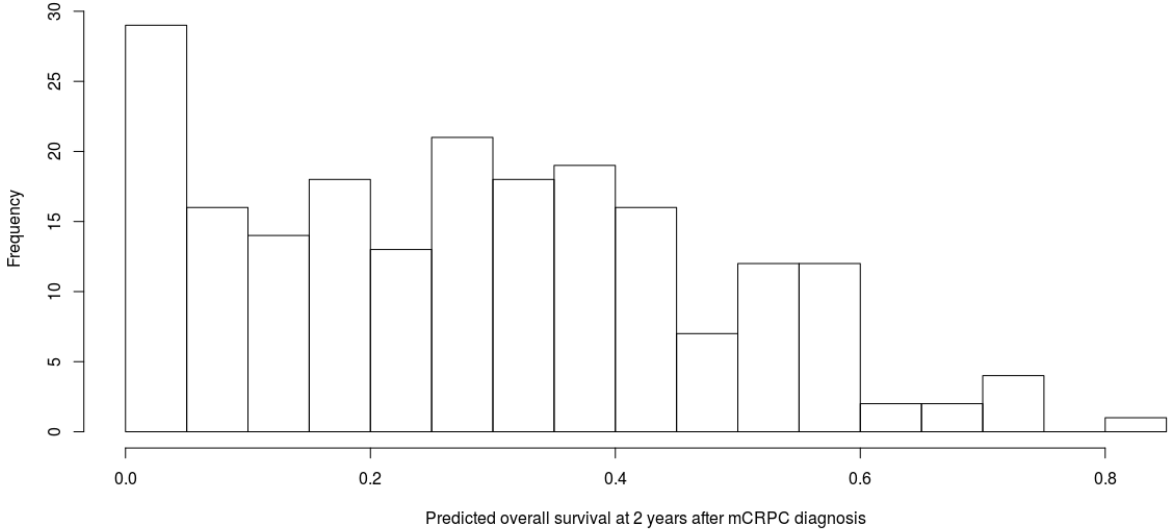

Abbreviation: mCRPC = metastatic castration-resistant prostate cancer.
